# Supplementary material
Source: publisher figshare collection journal article supplement (https://acs.figshare.com/ndownloader/files/25996502)
Supplement: Supplementary file 1 [file 25996502]

Duet Fe<sub>3</sub>C and FeN<sub>x</sub> Sites for H<sub>2</sub>O<sub>2</sub> Generation and Activation toward  
Enhanced Electro-Fenton Performance in Wastewater Treatment

Jingjing Hu <sup>a,b</sup>, Sen Wang <sup>a</sup>, Jiaqi Yu <sup>a</sup>, Wenkai Nie <sup>a</sup>, Jie Sun <sup>a,\*</sup>,  
Shaobin Wang <sup>c,\*\*</sup>

<sup>a</sup>. Key Laboratory of Catalysis and Materials Science of the State Ethnic Affairs Commission  
& Ministry of Education, Hubei Province, College of Resource and Environmental Science,  
South-Central University for Nationalities, Wuhan 430074, PR China

<sup>b</sup>. National Demonstration Center for Experimental Ethnopharmacology Education (South-  
Central University for Nationalities), Wuhan, 430074, China

<sup>c</sup>. School of Chemical Engineering and Advanced Materials, The University of Adelaide, SA  
5005, Australia

*\*Corresponding authors. E-mail: jetsun@mail.scuec.edu.cn (J. Sun);*

*shaobin.wang@adelaide.edu.au (S. Wang)*

The supporting information includes:

**12 Pages**

**4 Texts**

**7 Tables**

**12 Figures**

## Text S1 Calculation of TOC removal rate and rate constant of 2-CP

The TOC removal rate was calculated by the following eq. S1:

$$TOC\ removal\ rate(\%) = \frac{TOC_0 - TOC_t}{TOC_0} \times 100\% \quad (S1)$$

where  $TOC_0$  and  $TOC_t$  represent the TOC values at initial and reaction time (t), respectively.

A graph of  $\ln([2-CP]_0/[2-CP]_t)$  versus time t would give a straight line with a slope as  $k_{app}$  (eq. S2),

$$\ln\left(\frac{[2-CP]_0}{[2-CP]_t}\right) = k_{app} \times t \quad (S2)$$

where  $[2-CP]_0$  and  $[2-CP]_t$  are the respective concentrations of 2-CP at initial and reaction time (t).

## Text S2 Linear sweep voltammetry (LSV) measurement of Fe-based catalysts.

About 5 mg sample was dispersed in 0.5 mL suspension including water, isopropanol and Nafion solution (5 wt%) (215:273.5:10.75). The mixture was immersed in an ultrasonic bath for 30 min to prepare a homogeneous ink. The working electrode was prepared by deposition of 10  $\mu$ L catalyst ink onto a Glassy carbon electrode (diameter: 3 mm). Hg/Hg<sub>2</sub>Cl<sub>2</sub> and Pt wire were used as reference and counter electrodes respectively. LSV measurements were performed in the electrolyte of 0.05 M Na<sub>2</sub>SO<sub>4</sub> at pH = 7.0. The sweep speed equals 10 mV/s.

## Text S3 Illustration of the calculation on the inhibition efficiency rate induced by quenching agents.

The inhibited efficiency rate was calculated according to the following equation (S3):

$$Inhibited\ efficiency\ rate(\%) = \frac{(k_{app} - k_{app,quenched})}{k_{app}} \times 100\% \quad (S3)$$

where  $k_{app}$  and  $k_{app,quenched}$  represent the original constant rate of the degradation and the value after quenched by scavengers, respectively.

## Text S4 DFT calculations of H<sub>2</sub>O<sub>2</sub> adsorption on FeN and Fe<sub>3</sub>C particles.

The density functional theory (DFT) calculations were further performed to understand the interactions

between  $\text{H}_2\text{O}_2$  and Fe-N<sub>x</sub> sites and Fe<sub>3</sub>C particles. The structure models of FeN and Fe<sub>3</sub>C were obtained based on the data of matched PDF card (JCPDS NO. 50-1087) and (JCPDS NO. 35-0772) as shown in Figure S12 and the corresponding results of the adsorption parameters were listed in Table S6.

66

**Table S1 HPLC analytical methods of chlorophenols.**

| Chemical name | Mobile phase |         | Flow rate<br>/mL·min <sup>-1</sup> | Wavelength/nm |
|---------------|--------------|---------|------------------------------------|---------------|
|               | Methanol/%   | Water/% |                                    |               |
| 2-CP          | 70           | 30      | 1                                  | 225           |
| 3-CP          | 70           | 30      | 1                                  | 225           |
| 4-CP          | 70           | 30      | 1                                  | 225           |
| 2,4-DCP       | 70           | 30      | 1                                  | 225           |
| 2,4,6-TCP     | 70           | 30      | 0.8                                | 296           |

67

68

69

**Table S2 Textural parameters of the as-prepared catalysts.**

| Sample                         | $S_{\text{BET}}(\text{m}^2 \cdot \text{g}^{-1})$ | Pore Volume( $\text{cm}^3 \cdot \text{g}^{-1}$ ) |                   | Average pore diameter(nm) |
|--------------------------------|--------------------------------------------------|--------------------------------------------------|-------------------|---------------------------|
|                                |                                                  | total                                            | mesoporous volume |                           |
| NC                             | 21.5                                             | 0.027                                            | 0.025             | 5.0                       |
| $\text{Fe}_3\text{C}@\text{C}$ | 278                                              | 0.196                                            | 0.122             | 2.8                       |
| $\text{FeNC}@\text{C}$         | 298                                              | 0.212                                            | 0.129             | 2.8                       |

70

71

72

**Table S3 <sup>57</sup>Fe Mössbauer fitted parameters of Fe-based catalysts.**

| Catalyst                       |    | IS<br>(mm·s <sup>-1</sup> ) | QS<br>(mm·s <sup>-1</sup> ) | H<br>(kOe) | W<br>(mm·s <sup>-1</sup> ) | Phase                                        | Spectral<br>contribution<br>(%) | Ref. No. |
|--------------------------------|----|-----------------------------|-----------------------------|------------|----------------------------|----------------------------------------------|---------------------------------|----------|
| $\text{FeNC}@\text{C}$         | D1 | 0.28                        | 0.95                        | -          | 0.35                       | $\text{Fe}^{\text{III}}\text{N}$             | 21.0                            | 1        |
|                                | S1 | 0.33                        | -0.02                       | 488.4      | 0.31                       | A site in $\text{Fe}_3\text{O}_4$            | 4.8                             | 2        |
|                                | S2 | 0.53                        | 0.02                        | 430.7      | 0.65                       | B site in $\text{Fe}_3\text{O}_4$            | 3.3                             | 2        |
|                                | S3 | -0.03                       | 0.00                        | 326.0      | 0.14                       | $\text{Fe}^0$                                | 6.4                             | 1        |
|                                | S4 | 0.20                        | 0.02                        | 205.8      | 0.15                       | $\text{Fe}_3\text{C}$                        | 35.7                            | 3        |
|                                | S5 | 0.18                        | -0.01                       | 195.0      | 0.35                       | $\chi$ - $\text{Fe}_5\text{C}_2(\text{III})$ | 24.7                            | 4        |
|                                | S6 | 0.24                        | -0.17                       | 118.1      | 0.19                       | $\chi$ - $\text{Fe}_5\text{C}_2(\text{III})$ | 4.1                             | 4        |
| $\text{Fe}_3\text{C}@\text{C}$ | D2 | 0.29                        | 0.92                        | -          | 0.45                       | $\text{Fe}^{3+}$                             | 15.3                            | 3        |
|                                | S4 | 0.20                        | 0.01                        | 205.9      | 0.20                       | $\text{Fe}_3\text{C}$                        | 84.7                            | 3        |

Experimental uncertainties: isomer shift:  $\text{IS} \pm 0.01 \text{ mm} \cdot \text{s}^{-1}$ ; quadrupole splitting:  $\text{QS} \pm 0.01 \text{ mm} \cdot \text{s}^{-1}$ ; line width:  $\text{W} \pm 0.01 \text{ mm} \cdot \text{s}^{-1}$ ; spectral contribution:  $\pm 0.5\%$ .

73

74

75

**Table S4 Relevant parameters of 2-CP degradation kinetics in the heterogeneous EF system under different conditions.**

| Catalysts           | Initial pH | Quenched reagent    | $k_{app}/\text{min}^{-1}$ | $R^2$  |
|---------------------|------------|---------------------|---------------------------|--------|
| FeNC@C              | 3.0        | none                | 0.0714                    | 0.9913 |
| FeNC@C              | 7.0        | none                | 0.0365                    | 0.9754 |
| FeNC@C              | 3.0        | TBA                 | 0.0185                    | 0.9332 |
| FeNC@C              | 7.0        | TBA                 | 0.0138                    | 0.9054 |
| FeNC@C              | 3.0        | DMSO                | 0.0357                    | 0.9037 |
| FeNC@C              | 7.0        | DMSO                | 0.0128                    | 0.9300 |
| FeNC@C              | 3.0        | TBA&DMSO            | 0.002                     | 0.9632 |
| FeNC@C              | 7.0        | TBA&DMSO            | 0.002                     | 0.8903 |
| FeNC@C              | 3.0        | Sodium citrate      | 0.0359                    | 0.9946 |
| FeNC@C              | 7.0        | Sodium citrate      | 0.0275                    | 0.988  |
| FeNC@C              | 3.0        | 1,10-phenanthroline | 0.0555                    | 0.9096 |
| FeNC@C              | 7.0        | 1,10-phenanthroline | 0.031                     | 0.9450 |
| FeNC@C              | 3.0        | SCN <sup>-</sup>    | 0.002                     | 0.9760 |
| FeNC@C              | 7.0        | SCN <sup>-</sup>    | 0.006                     | 0.9231 |
| Fe <sub>3</sub> C@C | 3.0        | none                | 0.0254                    | 0.9521 |
| Fe <sub>3</sub> C@C | 7.0        | none                | 0.0202                    | 0.9040 |

**Table S5 Relevant parameters of 2-CP degradation in practical effluents.**

| Sample                       | [HCO <sub>3</sub> <sup>-</sup> ]10 <sup>-3</sup><br>mol/L | pH   | TOC(mg/L<br>) | IC(mg/L) | Conductivity (us/cm) | Degradation<br>Efficiency |
|------------------------------|-----------------------------------------------------------|------|---------------|----------|----------------------|---------------------------|
| Yangtze river                | 1.1                                                       | 7.88 | 4.68          | 22.36    | 357                  | 85.4%                     |
| Secondary sedimentation tank | 1.1                                                       | 8.10 | 19.60         | 24.60    | 820                  | 90.1%                     |

**Table S6 DFT results of H<sub>2</sub>O<sub>2</sub> adsorbed on the surface of Fe<sub>3</sub>C@C and FeN@C in the FeNC@C catalyst.**

|                                                             | O-O (Å) | O-H (Å) | O-Fe (Å) | $E_{ads}(\text{H}_2\text{O}_2)(\text{eV})$ |
|-------------------------------------------------------------|---------|---------|----------|--------------------------------------------|
| H <sub>2</sub> O <sub>2</sub> single                        | 1.47    | 0.98    | -        | -                                          |
| H <sub>2</sub> O <sub>2</sub> adsorbed on FeN               | 1.98    | 0.98    | 1.84     | -0.35                                      |
| H <sub>2</sub> O <sub>2</sub> adsorbed on Fe <sub>3</sub> C | 1.51    | 0.99    | 2.13     | -0.29                                      |

**Table S7 H<sub>2</sub>O<sub>2</sub> concentrations generated in 120 min from different catalysts under various conditions in HEF system.**

| Sample                  | pH3.0/mM | pH7.0/mM |
|-------------------------|----------|----------|
| blank                   | 0.46     | 0.25     |
| Fe <sub>3</sub> C@C     | 1.08     | 0.51     |
| FeNC@C                  | 0.40     | 0.22     |
| NC                      | 0.60     | 0.37     |
| Fe <sub>3</sub> C@C-SCN | 1.28     | 0.64     |
| FeNC@C-SCN              | 1.50     | 0.81     |
| NC-SCN                  | 0.74     | 0.45     |

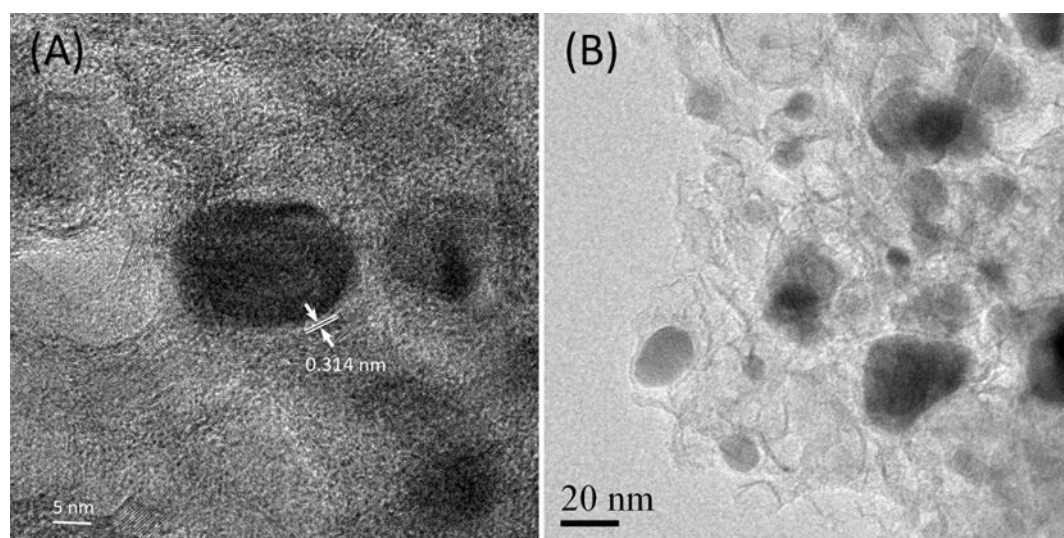

**Figure S1 TEM images of pristine (A) and treated FeNC@C samples (B).**

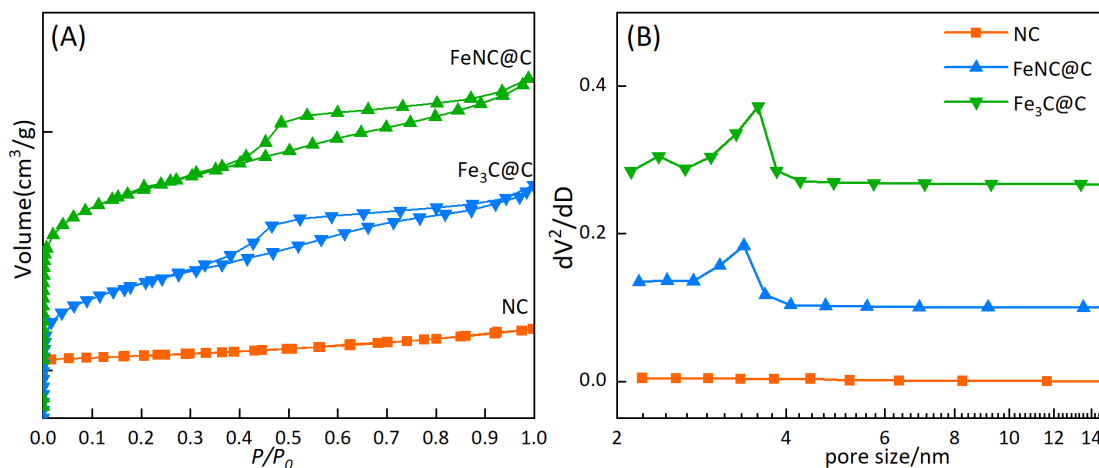

Figure S2 N<sub>2</sub> physical-adsorption isotherms (A) and BJH pore size distribution (B) of samples.

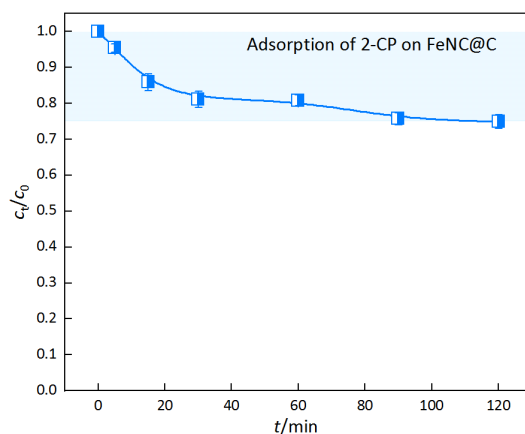

Figure S3 The adsorption kinetic curve of 2-CP on FeNC@C catalyst in solution at pH 3.0 ( $V=50.0$  mL;  $c_{\text{catalyst}}=0.5$  g/L;  $[\text{Na}_2\text{SO}_4]=0.05$  M;  $[\text{2-CP}]=0.2$  mM;  $T=298$  K).

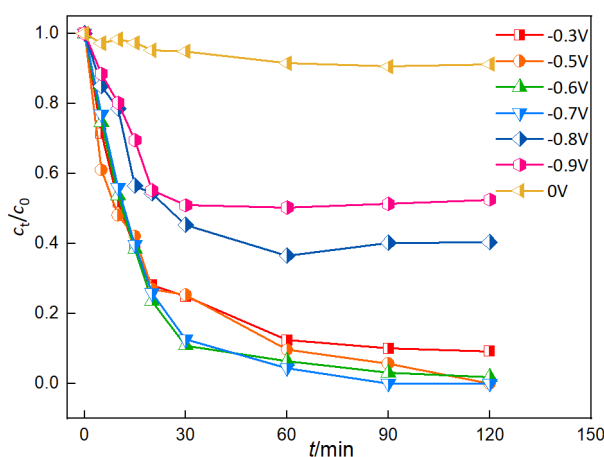

Figure S4 The degradation curves of 2-CP by FeNC@C in HEF system at pH 3.0 with various potentials. ( $V=50.0$  mL;  $c_{\text{catalyst}}=0.5$  g/L;  $[\text{Na}_2\text{SO}_4]=0.05$  M;  $[\text{2-CP}]=0.2$  mM;  $\text{O}_2$  flow rate=0.3 L/min;  $T=298$  K.)

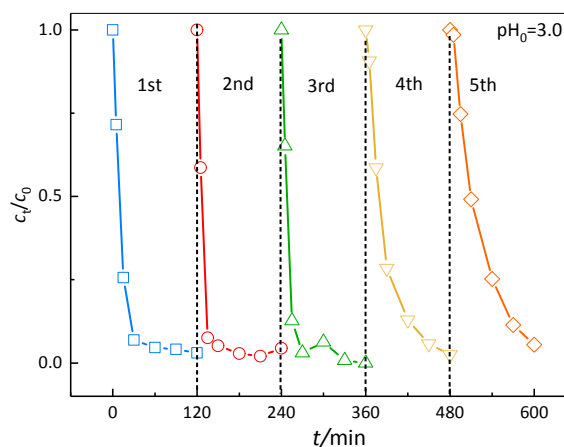

**Figure S5** The reusability of FeNC@C in degrading 2-CP in HEF system at pH 3.0. ( $V=50.0$  mL;  $c_{\text{catalyst}}=0.5$  g/L;  $[\text{Na}_2\text{SO}_4]=0.05$  M;  $[\text{2-CP}]=0.2$  mM;  $\text{O}_2$  flow rate=0.3 L/min;  $T=298$  K)

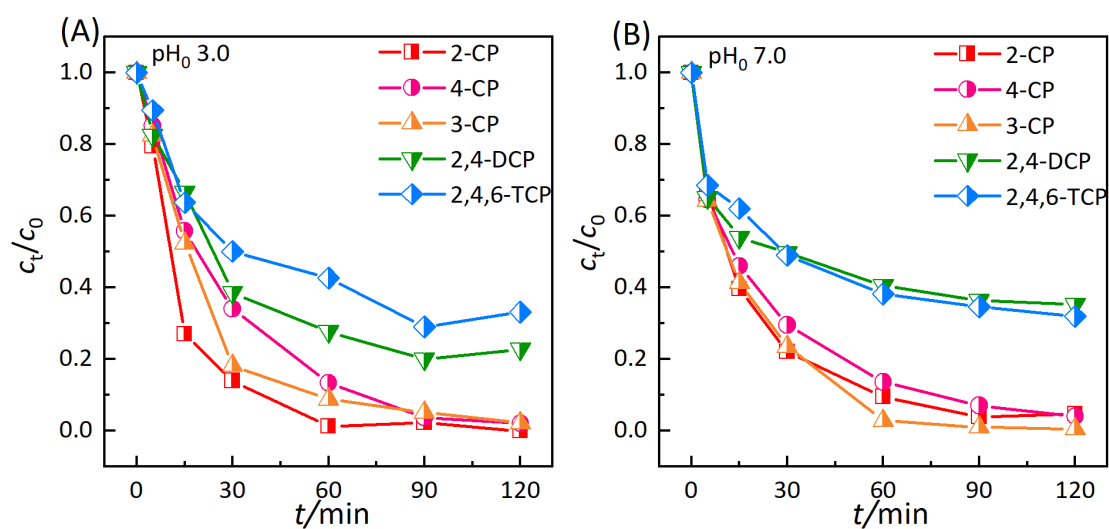

**Figure S6** The degradation curves of different chlorophenols by FeNC@C in HEF system at pH 3.0 (A) and 7.0 (B). ( $V=50.0$  mL;  $c_{\text{catalyst}}=0.5$  g/L;  $[\text{Na}_2\text{SO}_4]=0.05$  M;  $[\text{chlorophenol}]=0.2$  mM;  $\text{O}_2$  flow rate=0.3 L/min;  $T=298$  K)



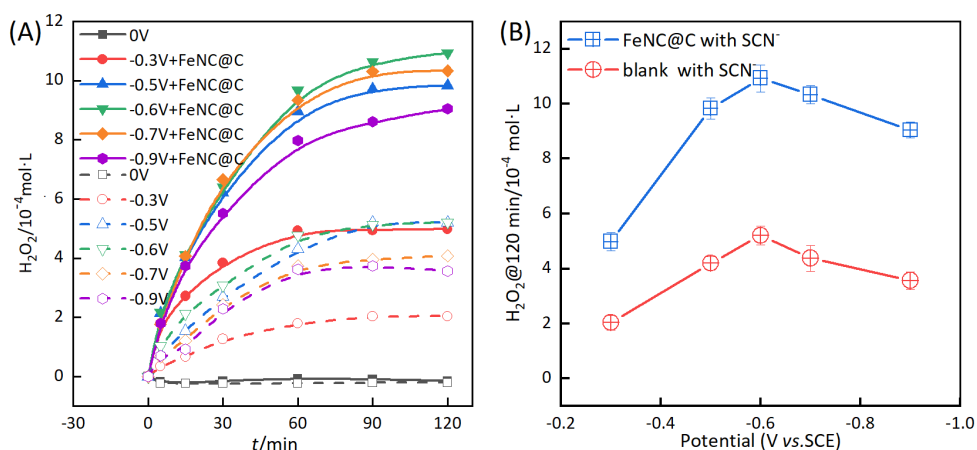

Figure S7 (A) The generation curves of  $\text{H}_2\text{O}_2$  in  $\text{FeNC@C}$  heterogeneous EF system in pH 3.0 solution at different potential in the presence of  $\text{SCN}^-$ . (B) The accumulated  $\text{H}_2\text{O}_2$  concentration at 120 min in  $\text{FeNC@C}$  or blank EF system in the presence of  $\text{SCN}^-$ . ( $V=50.0 \text{ mL}$ ;  $c_{\text{catalyst}}=0.5 \text{ g/L}$ ;  $[\text{Na}_2\text{SO}_4]=0.05 \text{ M}$ ;  $[\text{SCN}^-]=0.2 \text{ mM}$ ;  $\text{O}_2$  flow rate  $=0.3 \text{ L/min}$ ;  $T=298 \text{ K}$ ;  $\text{pH}_0=3.0$ )

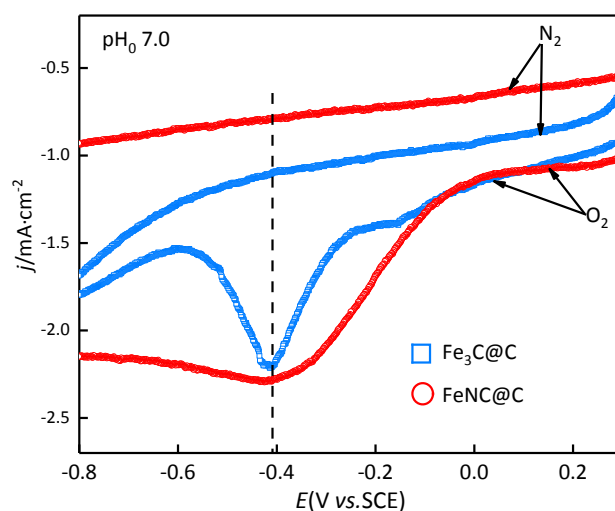

Figure S8 LSV curves of Fe-based catalysts in  $\text{O}_2/\text{N}_2$  saturated neutral solution. ( $[\text{Na}_2\text{SO}_4]=0.05 \text{ M}$ ;  $\text{pH}_0=7.0$ ;  $T=298\text{K}$ .)

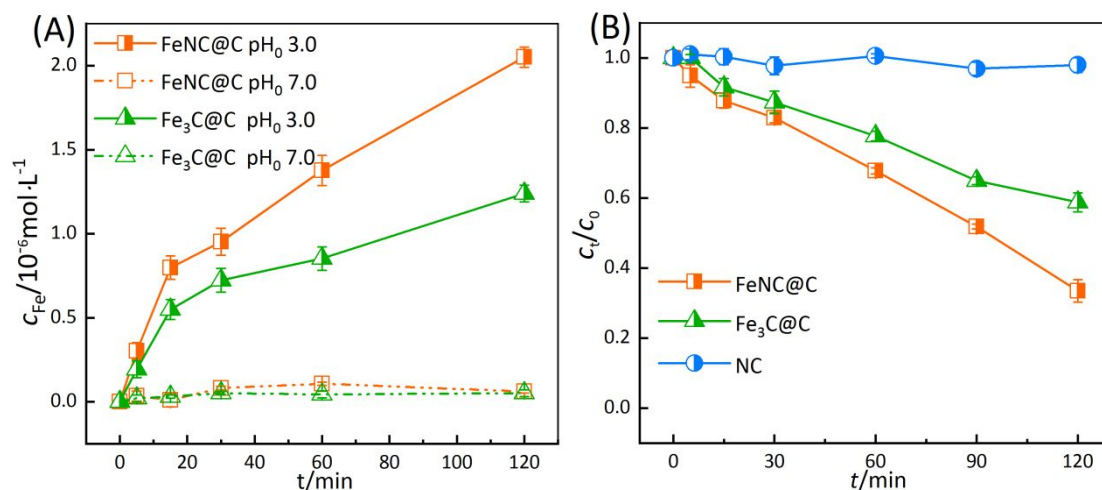

Figure S9 (A) Fe leaching to the aqueous solution under various pH conditions. (B) The decomposition curves of H<sub>2</sub>O<sub>2</sub> by Fe-based catalysts in neutral solution. ( $V=50.0 \text{ mL}$ ;  $c_{\text{catalyst}}=0.5 \text{ g/L}$ ;  $T=298 \text{ K}$ ;  $[\text{H}_2\text{O}_2]=10 \text{ mM}$ .)

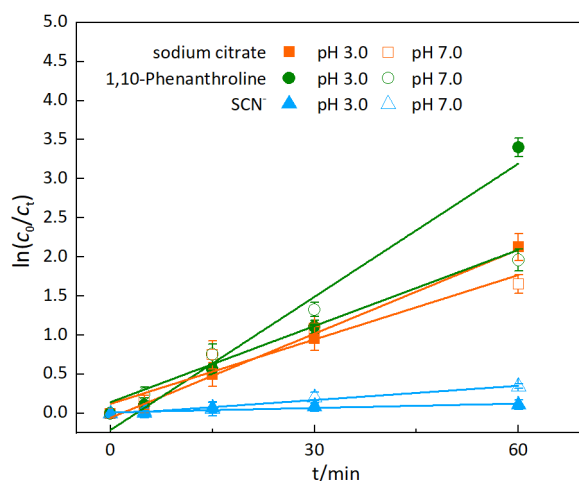

Figure S10 The kinetics fitting curves of 2-CP in Fe-based heterogeneous EF system with poisonous reagents for different Fe species. ( $V=50.0 \text{ mL}$ ;  $c_{\text{catalyst}}=0.5 \text{ g/L}$ ;  $[\text{Na}_2\text{SO}_4]=0.05 \text{ M}$ ;  $[\text{2-CP}]=0.2 \text{ mM}$ ;  $\text{O}_2$  flow rate  $=0.3 \text{ L/min}$ ;  $T=298 \text{ K}$ ;  $[\text{sodium citrate}]=[\text{SCN}^-]=[\text{1,10-phenanthroline}]=100 \text{ mM}$ .)

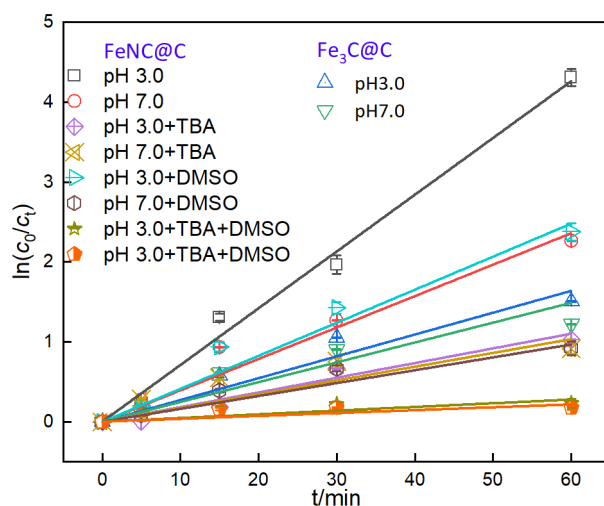

Figure S11 The kinetic curves of 2-CP in Fe-based heterogeneous EF system with different radical scavengers. ( $V=50.0$  mL;  $c_{\text{catalyst}}=0.5$  g/L;  $[\text{Na}_2\text{SO}_4]=0.05$  M;  $[\text{2-CP}]=0.2$  mM;  $\text{O}_2$  flow rate=0.3 L/min;  $T=298$  K;  $[\text{DMSO}]=[\text{TBA}]=100$  mM.)

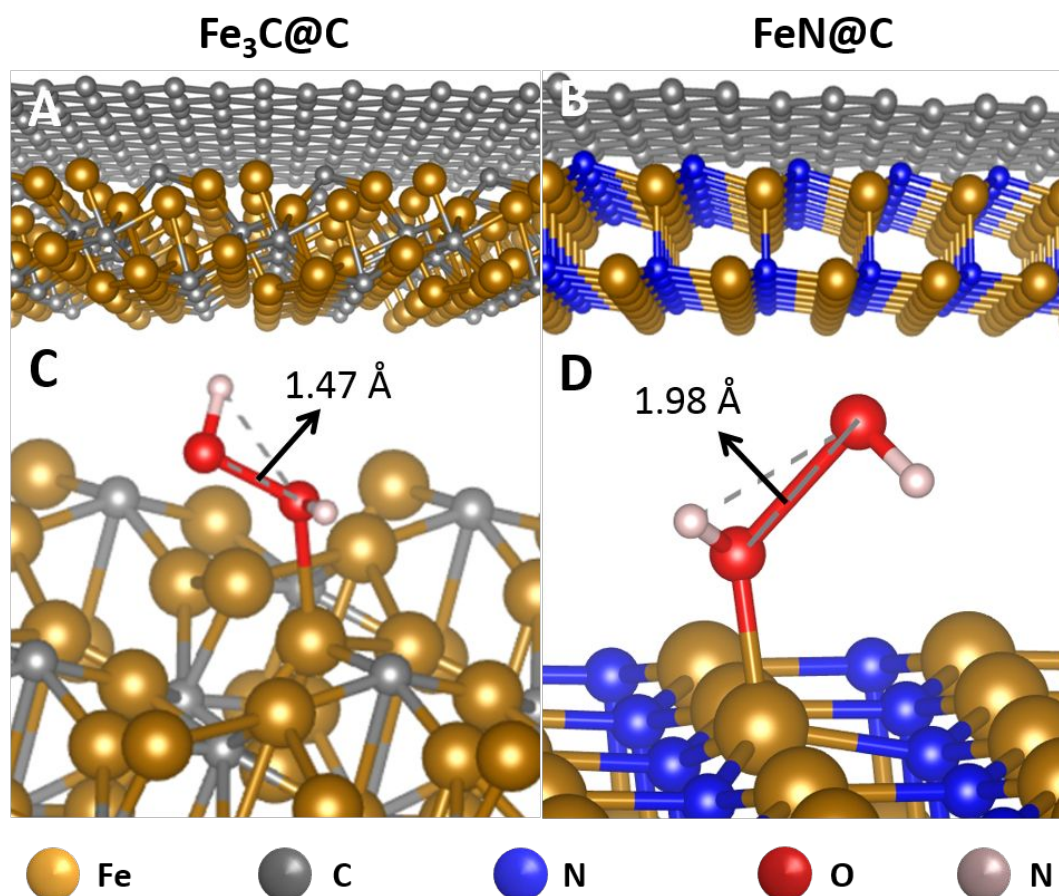

Figure S12 Optimized structures of FeNC@C catalyst. (A) Fe<sub>3</sub>C; (B) FeN; (C) H<sub>2</sub>O<sub>2</sub> adsorbed on Fe<sub>3</sub>C; (D) H<sub>2</sub>O<sub>2</sub> adsorbed on FeN.

## References

1. Liu, W.; Zhang, L.; Liu, X.; Liu, X.; Yang, X.; Miao, S.; Wang, W.; Wang, A.; Zhang, T. Discriminating catalytically active species of atomically dispersed Fe-N-C catalyst for selective oxidation of the C-H bond. *J. Am. Chem. Soc.* **2017**, *139* (31), 10790-10798.
2. Zeng, Q. Z.; Jiang, D. M.; Yang, S. Enhancement of magnetic properties in hard/soft CoFe<sub>2</sub>O<sub>4</sub>/Fe<sub>3</sub>O<sub>4</sub> nanocomposites. *RSC Adv.* **2016**, *6* (52), 46143-46148.
3. Lyu, S.; Liu, C.; Wang, G.; Zhang, Y.; Li, J.; Wang, L. Structural evolution of carbon in an Fe@C catalyst during the Fischer–Tropsch synthesis reaction. *Catal. Sci. Tech.* **2019**, *9* (4), 1013-1020.
4. Santos, V. P.; Wezendonk, T. A.; Jaen, J. J.; Dugulan, A. I.; Nasalevich, M. A.; Islam, H. U.; Chojecki, A.; Sartipi, S.; Sun, X.; Hakeem, A. A.; Koeken, A. C.; Ruitenbeek, M.; Davidian, T.; Meima, G. R.; Sankar, G.; Kapteijn, F.; Makkee, M.; Gascon, J. Metal organic framework-mediated synthesis of highly active and stable Fischer-Tropsch catalysts. *Nat. Commun.* **2015**, *6*, 6451.
